# Supplementary material
Source: PubMed Central journal article supplement (PMC7430197)
Supplement: NIHMS1617371-supplement-Supplementary_Materials.pdf [file NIHMS1617371-supplement-Supplementary_Materials.pdf]

| Cell Line  | Median | IQR    | Shannon Index |
|------------|--------|--------|---------------|
| MCF-7      | -8.79  | -8.92  | -9.72         |
| T47D       | -10.02 | -10.61 | -10.76        |
| BT474      | -10.46 | -11.07 | -11.88        |
| MDA-MB-453 | -9.94  | -9.91  | -10.43        |
| A549       | -7.72  | -7.77  | -8.53         |
| UMUC3      | -10.33 | -10.98 | -11.10        |

**Supplementary Table 1.** LogEC<sub>50</sub> (M) values across cell lines and single cell indexes for DHT.

| Code | CAS #      | Name                               |
|------|------------|------------------------------------|
| A01  | 57-83-0    | Progesterone                       |
| A02  | 446-72-0   | Genistein                          |
| A03  | 789-02-6   | o,p'-DDT                           |
| A04  | 68392-35-8 | 4-Hydroxytamoxifen                 |
| A05  | 10540-29-1 | Tamoxifen                          |
| A06  | 85-68-7    | Benzyl butyl phthalate             |
| B01  | 520-18-3   | Kaempferol                         |
| B02  | 65277-42-1 | Ketoconazole                       |
| B03  | 72-43-5    | Methoxychlor                       |
| B04  | 140-66-9   | 4-(1,1,3,3-Tetramethylbutyl)phenol |
| B05  | 50-28-2    | 17beta-Estradiol                   |
| B06  | 50-22-6    | Corticosterone                     |
| C01  | 80-05-7    | Bisphenol A                        |
| C02  | 84-74-2    | Dibutyl phthalate                  |
| C03  | 66-81-9    | Cycloheximide                      |
| C04  | 1912-24-9  | Atrazine                           |
| C05  | 52-01-7    | Spironolactone                     |
| C06  | 486-66-8   | Daidzein                           |
| D01  | 599-64-4   | 4-Cumylphenol                      |
| D02  | 480-40-0   | Chrysin                            |
| D03  | 72-55-9    | p,p'-DDE                           |
| D04  | 53-16-7    | Estrone                            |
| D05  | 521-18-6   | 5alpha-Dihydrotestosterone         |
| D06  | 52-86-8    | Haloperidol                        |
| E01  | 117-81-7   | Di(2-ethylhexyl) phthalate         |
| E02  | 77-40-7    | Bisphenol B                        |
| E03  | 58-18-4    | 17-Methyltestosterone              |

|     |            |                          |
|-----|------------|--------------------------|
| E04 | 52806-53-8 | Hydroxyflutamide         |
| E05 | 330-55-2   | Linuron                  |
| E06 | 60168-88-9 | Fenarimol                |
| F01 | 143-50-0   | Kepone                   |
| F02 | 57-91-0    | 17alpha-Estradiol        |
| F03 | 32809-16-8 | Procymidone              |
| F04 | 56-53-1    | Diethylstilbestrol       |
| F05 | 54965-24-1 | Tamoxifen citrate        |
| G01 | 82640-04-8 | Raloxifene hydrochloride |
| G02 | 84-16-2    | meso-Hexestrol           |
| G03 | 13311-84-7 | Flutamide                |
| G04 | 115-32-2   | Dicofol                  |
| G05 | 104-40-5   | 4-Nonylphenol            |
| H01 | 520-36-5   | Apigenin                 |
| H02 | 57-30-7    | Phenobarbital sodium     |
| H03 | 120-47-8   | Ethylparaben             |
| H04 | 50-55-5    | Reserpine                |
| H05 | 57-63-6    | 17alpha-Ethinylestradiol |

**Supplementary Table 2.** List of the 45 EPA compounds used in HTM

| Compound              | Median | IQR   | Shannon Index |
|-----------------------|--------|-------|---------------|
| Progesterone          | -6.86  | -6.96 | -9.48         |
| BBP                   | n.a.   | n.a.  | n.a.          |
| 17-methyltestosterone | -8.59  | -8.56 | -8.84         |
| Hydroxyflutamide      | -7.51  | -7.19 | -7.27         |
| 17a-E2                | -5.94  | -5.89 | -6.88         |
| Procymidone           | n.a.   | n.a.  | n.a.          |

**Supplementary Table 3.** LogEC<sub>50</sub> values (M) across indexes for the compounds selected in **Figure 6** when treated alone

| Compound     | Median | IQR   | Shannon Index |
|--------------|--------|-------|---------------|
| Progesterone | -5.77  | -5.86 | -5.67         |

|                       |       |       |       |
|-----------------------|-------|-------|-------|
| BPP                   | -4.92 | -6.12 | -5.94 |
| 17-methyltestosterone | -6.47 | -9.53 | -6.72 |
| Hydroxyflutamide      | -5.87 | -5.97 | -5.86 |
| 17a-E2                | -6.18 | -6.71 | -6.31 |
| Procymidone           | -5.98 | -6.61 | -6.15 |

**Supplementary Table 4.** LogEC<sub>50</sub> values (M) across indexes for the compounds selected in **Figure 6** when treated in combination with DHT.
